# Supplementary material for: Synchrotron XRF Analysis Identifies Cerium Accumulation Colocalized with Pharyngeal Deformities in CeO2 NP-Exposed Caenorhabditis elegans
Source: PubMed Central journal article supplement (PMC9022427; doi:10.1021/acs.est.1c08509), 2022-04-04
Supplement: es1c08509_si_001.pdf [file es1c08509_si_001.pdf]

1 **Supporting Information**

2

3 **Synchrotron XRF analysis identifies cerium accumulation co-localized with pharyngeal**  
4 **deformities in CeO<sub>2</sub> NP exposed *Caenorhabditis elegans***

5 **Roszbach Lisa Magdalena<sup>1,2</sup> \*, Brede Dag Anders<sup>1,2</sup>, Nuyts Gert<sup>3</sup>, Cagno Simone. <sup>1,2</sup>,**  
6 **Olsson Ragni Maria Skjervold<sup>1,4</sup>, Oughton Deborah Helen<sup>1,2</sup>, Falkenberg Gerald<sup>5</sup>,**  
7 **Janssens Koen<sup>3</sup>, Lind Ole Christian<sup>1,2</sup>**

8 <sup>1</sup>Norwegian University of Life Sciences, Faculty of Environmental Sciences and Natural  
9 Resource Management, P.O. BOX 5003 NMBU, No-1432 Ås, Norway

10 <sup>2</sup>Centre for Environmental Radioactivity (CERAD CoE), Faculty of Environmental Sciences  
11 and Natural Resource Management, Norwegian University of Life Sciences (NMBU), P.O.  
12 Box 5003, 1432 Ås, Norway

13 <sup>3</sup>University of Antwerp, Faculty of Science, AXIS Research group, Groenenborgerlaan 171,  
14 2020 Antwerp, Belgium

15 <sup>4</sup>Norwegian University of Science and Technology, Faculty of Natural Sciences, P.O. Box  
16 8900, NO-7491 Trondheim, Torgarden, Norway.

17 <sup>5</sup>Deutsches Elektronen-Synchrotron DESY, Photon Science, Notkestr. 85, 22607 Hamburg,  
18 Germany

19 \*Corresponding Author: [Lisa.rossbach@nmbu.no](mailto:Lisa.rossbach@nmbu.no)

20

21 Number of pages: 19

22 Number of Figures: 13

23 Number of Tables: 2

24

25

26 **1. Method**

27 1.1 Nanoparticle stock preparation and characterization

28 The CeO<sub>2</sub> NP (544841, Sigma Aldrich) stock suspensions were prepared by adding 10 mg L<sup>-1</sup>  
29 CeO<sub>2</sub> NPs to 10 ml ddH<sub>2</sub>O (15 MΩ·cm) with 0.2 % Tween 20 (P1379, Sigma Aldrich). The  
30 suspensions were vortexed at 3000 rotations/min (MS basic, IKA) for 5 minutes, before being  
31 alternately sonicated at 35 kHz (Sonorex RK106, Bandelin) for 5 minutes and vortexed for 10  
32 seconds, for 1 hour. Three replicate working solutions were prepared by diluting 1 ml of the  
33 NP suspension 10 x in moderately hard reconstituted water (MHRW, pH 7.7) [1] with 0.2 %  
34 Tween 20 (MHRW-T). The aforementioned alternation of vertexing and sonication was  
35 repeated for the preparation of the MHRW-T. The working solutions were allowed to settle  
36 over night to remove larger aggregates from the suspensions. Aliquot samples were taken from  
37 the 5 ml mark, and immediately used for toxicity testing or characterization. For the purpose  
38 of comparison, the Ce(NO<sub>3</sub>)<sub>3</sub> stock solution was prepared in MHRW + Tween 20.

39 Size distribution of the NPs was measured using Transmission electron microscopy (TEM,  
40 Morgagni 268, FEI), Nanoparticle tracing analysis (NTA, Nanosight LM10, Malvern  
41 Panalytical), and dynamic light scattering (DLS, Malvern PN3702 Zetasizer Nanoseries,  
42 Malvern Inc., Malvern, UK). Image analysis software ImageJ was used for maximum ferret  
43 diameter measurements of TEM micrographs. For electrophoretic mobility measurements of  
44 the NPs, particles suspensions were measured using dynamic light scattering (DLS, Malvern  
45 PN3702 Zetasizer Nanoseries). Size fraction and particle dissolution assessment was carried  
46 out at T-0 and 72 hrs of exposure by ultrafiltration (14,000 g for 30 min) of the exposure media  
47 using pre-conditioned <3 kDa Millipore Centrifugal filters (Amicon, Millipore, Billerica, MA)  
48 of low, medium, and a high Ce(NO<sub>3</sub>)<sub>3</sub> or CeO<sub>2</sub> NP concentration, in triplicate. The contents of  
49 the whole exposure well was taken, to include all particles. Prior ultrafiltration samples were  
50 centrifuged (2000 g for 5 minutes) to remove the *Escherichia coli* and larger aggregates to  
51 avoid clogging of the filter units. Exposure concentrations and size fractions were determined  
52 using Inductively coupled mass spectroscopy (ICP-MS, ICP-MS Agilent 8800, Mississauga,  
53 Canada) measuring the Ce (140) isotope, at a detection limit of 0.0003 ppm. A house standard  
54 (1643H), prepared from the certified refence material 1640a with the addition of a 1 µg L<sup>-1</sup> Ce  
55 from the CRM 71A, was used as a calibration check. A purity check of the CeO<sub>2</sub> NP stock  
56 solution showed 97.1% purity of the CeO<sub>2</sub> NPs in ddH<sub>2</sub>O.

57

## 58 1.2 Nematode Culture and Exposure

59 For synchronization of the nematode culture, nematodes previously kept in liquid cultures were  
60 treated with hypochlorite solution for egg extraction. Eggs were allowed to hatch over night to  
61 obtain synchronized L1 stage nematodes. Synchronized nematodes were exposed for 96 h, in  
62 triplicate, in 24 well exposure plates, from L1 stage at 20°C in the dark, with continuous gentle  
63 shaking (100 rotations/min). Each well contained 1 ml of *Escherichia coli* OP50 resuspended  
64 in MHRW [1], and  $11 \pm 3$  L1 stage nematodes. The N2 Bristol strain was exposed to seven  
65 concentrations in the range of 0.5 – 34.96 mg Ce L<sup>-1</sup>, or 12 concentrations in the range of 2.3  
66 – 26 mg Ce L<sup>-1</sup> of CeO<sub>2</sub> NPs or Ce(NO<sub>3</sub>)<sub>3</sub>, respectively (measured concentrations, see table  
67 S1). For the termination of the N2 toxicity test at T-96 h, 500µl of Rose Bengal (616 µM) was  
68 added to each well, before heating at 80°C for 10 minutes. For the assessment of growth,  
69 fertility and reproduction [2], a stereo microscope (Leica M205C), equipped with digital  
70 camera (MC170 HD, Leica), and a hand held tally counter were used.

71 To determine the uptake of Ce, nematodes were exposed in triplicate to either 2.3, 4.19, and  
72 614, or 0.99, 8.03, and 34.96 mg Ce L<sup>-1</sup> of either Ce(NO<sub>3</sub>)<sub>3</sub> or CeO<sub>2</sub> NPs, respectively, for 72  
73 hours. For total body burden nematodes were removed from the exposure and washed three  
74 times in 1 ml MHRW (un-depurated nematodes). Parallel replicate nematodes were placed on  
75 NGM agar plates seeded with *E. coli*, to assess the Ce fraction tightly bound to the nematodes.  
76 Following 2 hours of depuration, nematodes were hand picked off the NGM plates and  
77 transferred into 15 ml tubes (depurated nematodes). Supernatant from all samples was  
78 evaporated prior ultrapure HNO<sub>3</sub> + 0.02% HF acid digestion at 90°C for 2 hours. To identify  
79 possible transfer of Ce from the supernatant during transfer, blank samples containing no  
80 nematodes were taken in addition. Samples were diluted to 10 vol % HNO<sub>3</sub> prior ICP-MS  
81 analysis. For both, un-depurated and depurated nematode samples, exact numbers of  
82 nematodes per individual tubes were recorded, for total Ce/nematode calculations.

83 For the *in vivo* assessment of the Sod-1, HyPer, and GRX strains, nematodes were sampled at  
84 72 h of exposure. Samples were analyzed for fluorescence as previously described by Rossbach  
85 et al. [3] and Maremonti et al. [4]. Briefly, nematodes were immobilized using 30 mM sodium  
86 azide (NaN<sub>3</sub>) and imaged on a fluorescent microscope (Leica DM6 B) equipped with a 405 nm  
87 excitation and 535 emission filter. For the oxidized to reduced ration of the HyPer and GRX  
88 biosensor strains, a second image at excitation 490 nm and emission 535 nm was taken. Ratio  
89 calculations were conducted as described by Back et al. [5]. Approximately 10 nematodes were

90 images per triplicate exposure well. Additionally, nematodes were imaged in phase contrast  
91 mode at 10x magnification to assess the total body length of the nematodes. For Quantification  
92 of fluorescent measurements, the Leica Application Suit X image software was used, for pixel  
93 based average intensity. To account for impacts of developmental stage on the SOD-1 signal  
94 strength, SOD-1 average intensity was normalized to total body length [6].

95 To test the antioxidant properties of the CeO<sub>2</sub> NPs, the aforementioned Ce exposed GRX  
96 nematodes were subjected to a further 10 min acute H<sub>2</sub>O<sub>2</sub> (23613.366 VWR Chemicals)  
97 exposure (107.7, 213.4, or 323.1 mM). Sampling was conducted as previously described.

98

## 99 2. Results

### 100 CeO<sub>2</sub> NP characterization

101 Several particle characteristics, including electrophoretic mobility and aggregation, are  
102 sensitive to small changes in pH, conductivity, or media composition, and may affect the  
103 stability of the particles in the exposure [7]. Therefore, to explain uptake, retention, and toxic  
104 effects of NPs, detailed characterization of the particles in their pristine state and in the  
105 exposure media is of importance [8].

106 To monitor the behavior of cerium during the exposure, concentrations in the exposure media  
107 were quantified by ICP-MS at T - 0 and 72 h (Table S1). Size distributions were relatively  
108 constant at 0 and 72 hr with the majority of the Ce being found in the particulate fraction,  
109 assumed to be associated with the *E. coli* bacterial cells. The sharp increase in the suspended  
110 fraction at 34.96 mg/l is most likely due to a sampling error. Results confirmed no significant  
111 difference between measured and nominal concentrations for the Ce(NO<sub>3</sub>)<sub>3</sub> exposure at the  
112 start (T-0) of the exposure (Table S1). However, a 35 – 80 % reduction in total Ce concentration  
113 was measured at 72 h in the Ce(NO<sub>3</sub>)<sub>3</sub> exposure. In comparison, CeO<sub>2</sub> NP concentrations  
114 remained relatively stable with a 0.4 – 22 % reduction over the course of the 72 hours exposure  
115 period (Table S1). The high degree of Ce removal from the Ce(NO<sub>3</sub>)<sub>3</sub> exposure is hypothesized  
116 to be the results of adhesion of the Ce to the exposure well surface.

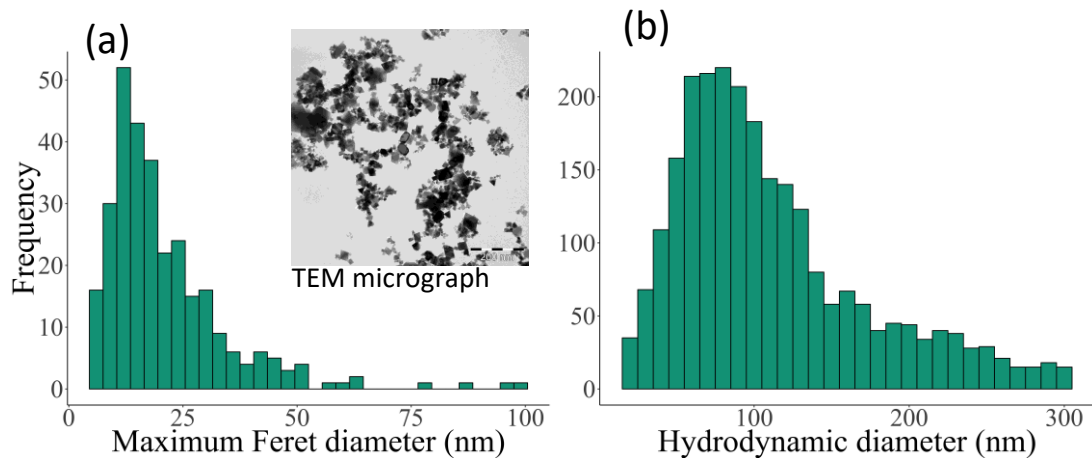

117

118 **Figure S1:** Histograms of the size distribution of CeO<sub>2</sub> NPs measured using TEM (a) and NTA  
 119 (b). Note the different range of x-values for the two graphs. The maximum Feret diameters in  
 120 (a) are measured from N=300 NPs from 5 TEM micrographs. The hydrodynamic diameters in  
 121 (b) are measured from 5 videos of 60 seconds, and an upper cut-off at 300 nm was set when  
 122 plotting the results.

123

124

125

126

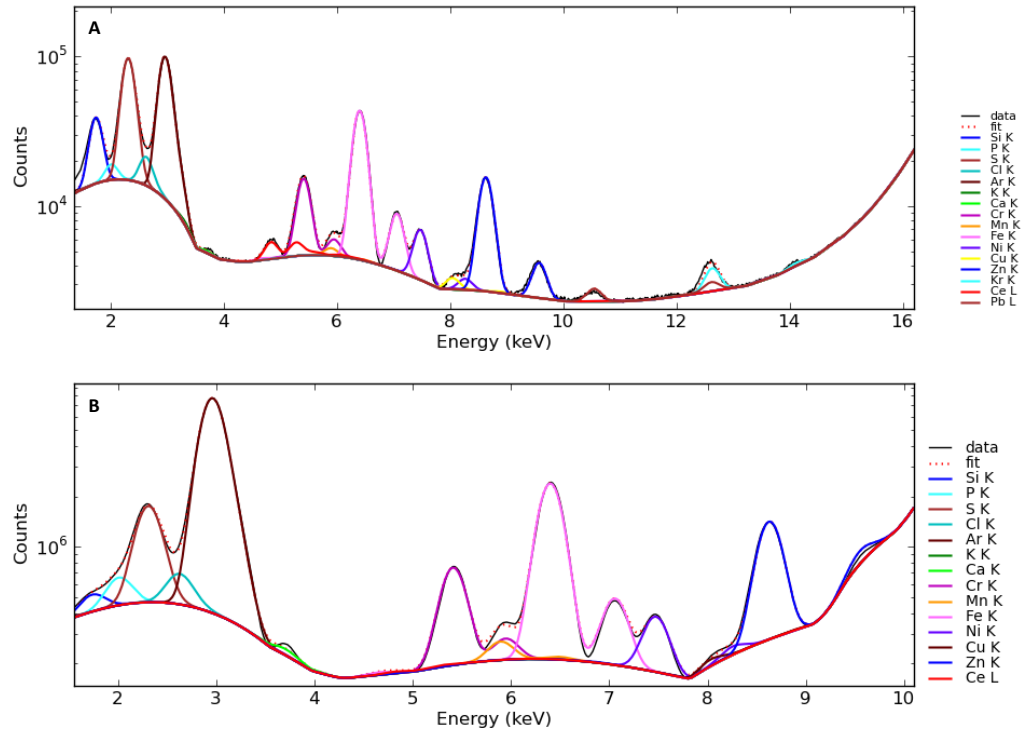

127

128 **Figure S2:** Sum XRF spectra of maps of whole intact *Caenorhabditis elegans* exposed to either  
 129  $\text{Ce}(\text{NO}_3)_3$  (A) or  $\text{CeO}_2$  NPs (B) obtained at the microprobe end-station of the P06 Hard X-ray  
 130 Micro/Nano-Probe beamline of the PETRA III storage ring of the DESY facility (Hamburg,  
 131 Germany).

132

133

134

135

136

137

138

**Table S1:** Speciation data for Ce(NO<sub>3</sub>)<sub>3</sub> or CeO<sub>2</sub> NPs in MHRW + Tween at the start (T – 0) and the end (72 hours) of exposure. Total, suspended, and <3 kDa fraction were analyzed using ICP-MS, while the particulate fraction was calculated as the difference between the total and suspended fraction.

|                                   |                              | T-0         |         |             |         |             |         |                   | 72 hours    |         |             |         |             |         |                   |
|-----------------------------------|------------------------------|-------------|---------|-------------|---------|-------------|---------|-------------------|-------------|---------|-------------|---------|-------------|---------|-------------------|
|                                   |                              | Total       |         | Suspended   |         | <3k Da      |         | Particulate       | Total       |         | Suspended   |         | <3k Da      |         | Particulate       |
| Exposure                          | Nominal concentration (mg/L) | conc (mg/L) | SD      | conc (mg/L) | SD      | conc (mg/L) | SD      | Calculated (mg/l) | conc (mg/L) | SD      | conc (mg/L) | SD      | conc (mg/L) | SD      | Calculated (mg/l) |
| Control                           |                              | 0,00019     | 0,00004 | 0,00000     | 0,00000 | 0,00000     | 0,00001 | 0,00019           | 0,00025     | 0,00009 | 0,00022     | 0,00021 | 0,00014     | 0,00015 | 0,00003           |
| Ce(NO <sub>3</sub> ) <sub>3</sub> | 2                            | 2,29809     | 0,30279 | 0,03584     | 0,00459 | 0,00008     | 0,00004 | 2,26225           | 1,48625     | 1,05547 | 0,00569     | 0,00201 | 0,00022     | 0,00020 | 1,48056           |
|                                   | 4                            | 4,18789     | 0,12378 | 0,05911     | 0,05964 | 0,00002     | 0,00001 | 4,12878           | N/A         | N/A     | 0,02037     | 0,01334 | 0,00058     | 0,00078 | N/A               |
|                                   | 6                            | 6,14161     | 0,28008 | 0,58100     | 0,52821 | 0,00006     | 0,00002 | 5,56061           | 2,08925     | 0,85947 | 0,23719     | 0,29517 | 0,00008     | 0,00008 | 1,85206           |
| CeO <sub>2</sub> NPs              | 1.03                         | 0,99128     | 0,01215 | 0,12702     | 0,01455 | 0,00003     | 0,00005 | 0,86425           | 1,0144      | 0,01288 | 0,01107     | 0,00076 | 0,00027     | 0,00024 | 0,09037           |
|                                   | 8.25                         | 8,02740     | 0,12549 | 0,64659     | 0,08292 | 0,00007     | 0,00003 | 7,38082           | 6,3242      | 0,07758 | 0,11131     | 0,02129 | 0,00003     | 0,00003 | 0,52110           |
|                                   | 33                           | 34,95596    | 0,42262 | 1,57788     | 0,11983 | 0,00005     | 0,00006 | 33,37808          | 34,83600    | 1,96401 | 20,54884    | 0,74131 | 0,35360     | 0,49998 | 14,28715          |

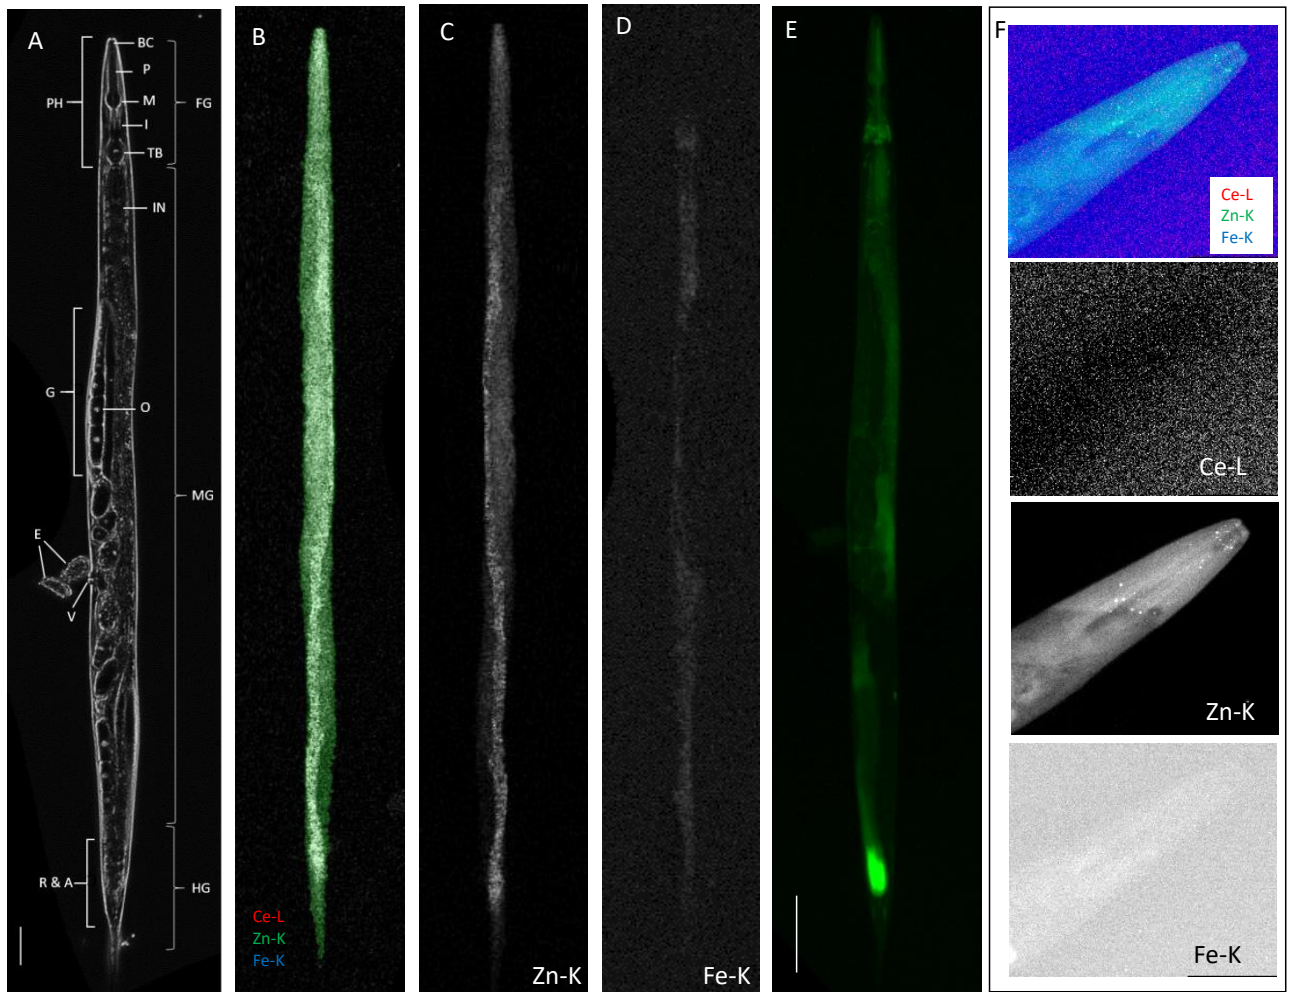

**Figure S3:** Imaging of an unexposed nematode (control). (A) Phase contrast (PH) microscopy image showing nematode anatomy. The foregut (FG), midgut (MG), hindgut (HG), buccal cavity (BC), procortex (P), metacortex (M), isthmus (I), terminal bulb (TB), pharynx (PH), intestine (IN), gonads (G), oocytes (O), vulva (V), rectum (R), anus (A), and eggs (E). (B - D) 2D XRF map (19,5 keV,  $1 \times 1 \mu\text{m}^2$ , step size, 7 msec exposure/pt), elemental maps; (B) Ce, Zn, and Fe (composition map), (C) Zn and (D) Fe. (E) *sod-1* gene expression of an unexposed control nematode. (F) 2-D XRF elemental maps of the nematode pharynx showing the nerve ring. Scale bars represent  $100 \mu\text{m}$ .



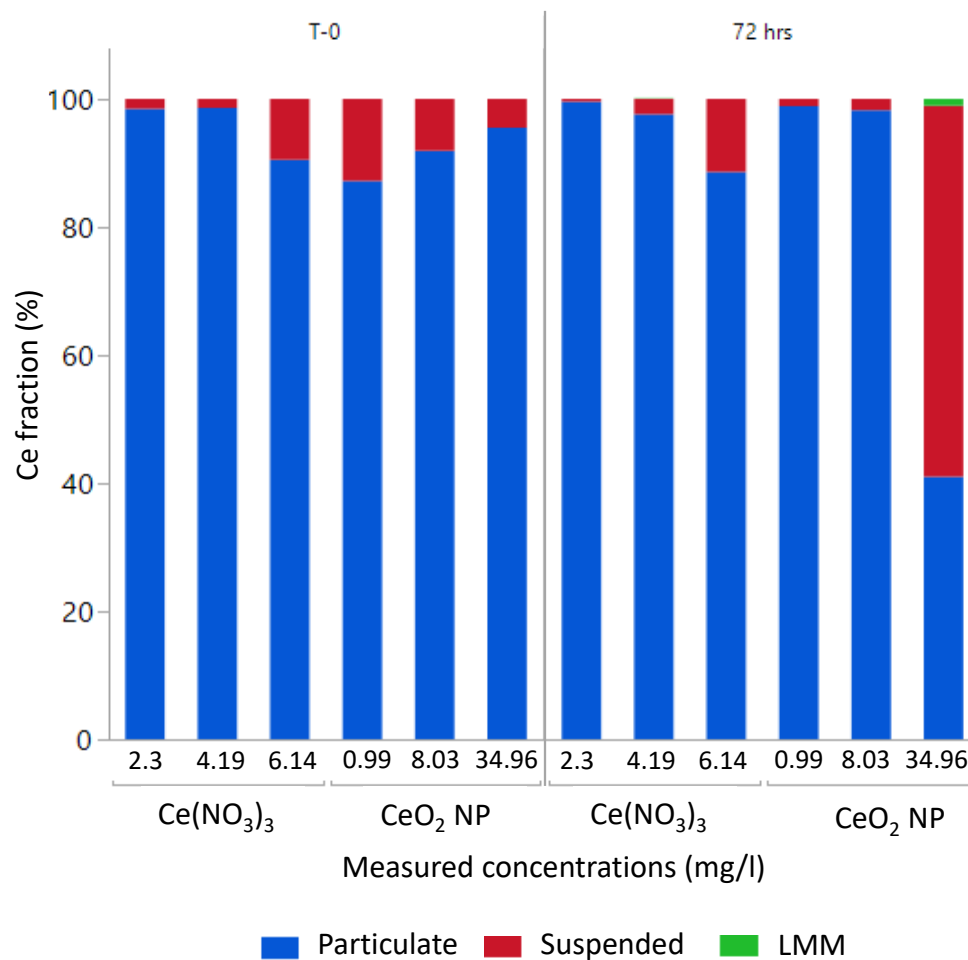

**Figure S4:** Particulate, suspended, and low molecular mass (LMM, <3 kDa) Ce fraction in the exposure media containing either Ce(NO<sub>3</sub>)<sub>3</sub> or CeO<sub>2</sub> NPs at T-0 or 72 hours in MHRW containing *E. coli*. For the suspended fraction *E. coli* was removed via centrifugation.

**Table S2:** Measured Ce concentrations in undepurated and depurated nematodes ( $n = 21 \pm 9$ ) for either  $\text{Ce}(\text{NO}_3)_3$  or  $\text{CeO}_2$  NPs exposed for 72 hours in MHRW\*.

| Exposure                   | Ce concentrations exposure media |                  | Ce concentrations in nematodes                |                                             |
|----------------------------|----------------------------------|------------------|-----------------------------------------------|---------------------------------------------|
|                            | Nominal (mg/l)                   | Measured (mg/l)  | Undepurated ( $\mu\text{g}/\text{nematode}$ ) | Depurated ( $\mu\text{g}/\text{nematode}$ ) |
| $\text{Ce}(\text{NO}_3)_3$ | 2                                | $2.3 \pm 0.3$    | $0.1 \pm 0.05$                                | $0.01 \pm 0.004$                            |
|                            | 4                                | $4.19 \pm 0.12$  | $0.09 \pm 0.04$                               | $0.06 \pm 0.004$                            |
|                            | 6                                | $6.14 \pm 0.28$  | $0.09 \pm 0.02$                               | $0.04 \pm 0.01$                             |
| $\text{CeO}_2$ NPs         | 1.03                             | $0.99 \pm 0.12$  | $0.003 \pm 0.0007$                            | <LOD                                        |
|                            | 8.25                             | $8.03 \pm 0.13$  | $0.04 \pm 0.01$                               | $0.02 \pm 0.02$                             |
|                            | 33                               | $34.96 \pm 0.42$ | $0.04 \pm 0.02$                               | $0.004 \pm 0.0008$                          |

\*LOD = limit of detection = 0.0003 ppm.

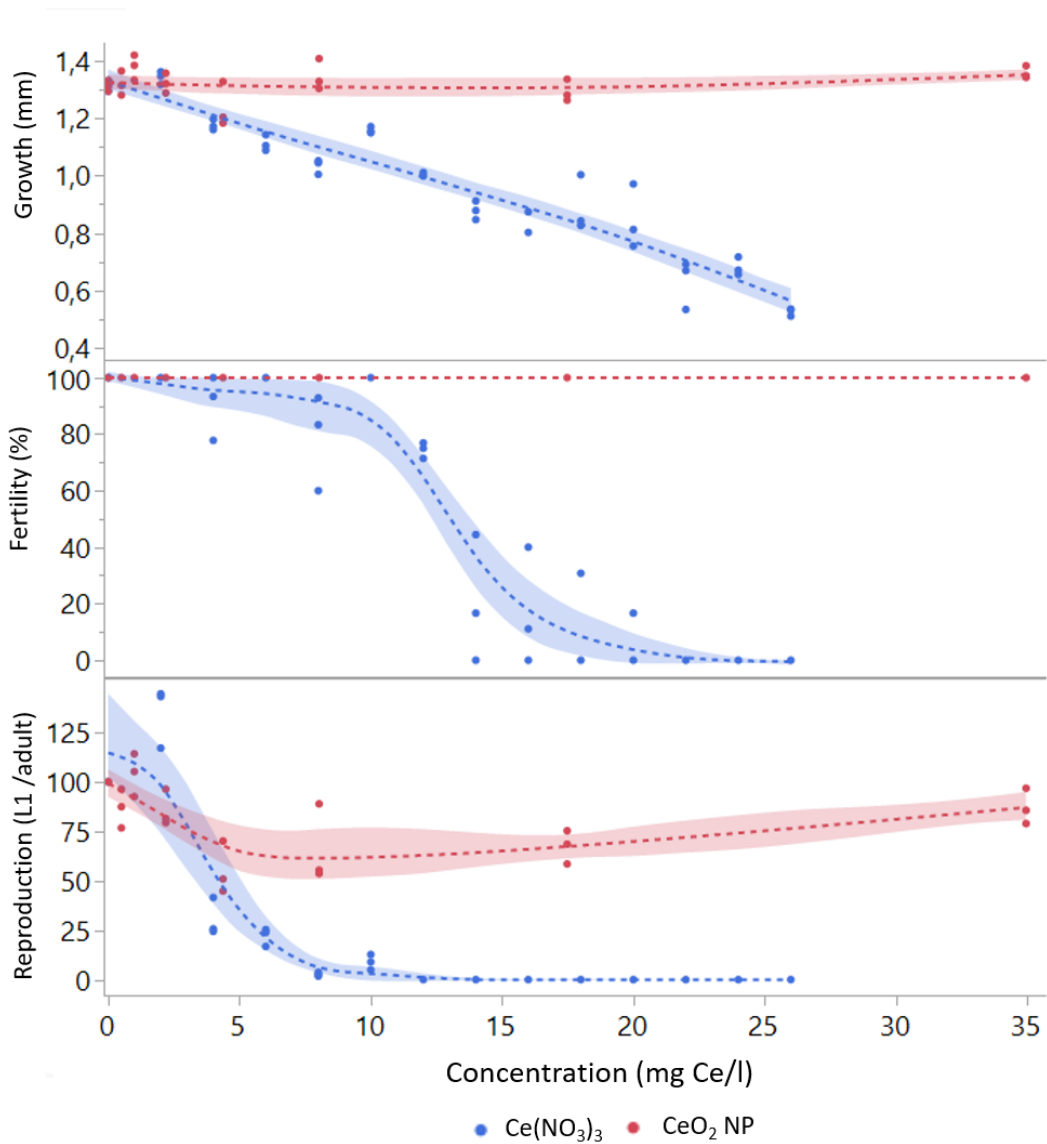

**Figure S5:** Growth, fertility and reproduction of *C. elegans* following the exposure to either  $\text{Ce}(\text{NO}_3)_3$  (a) or  $\text{CeO}_2$  NPs (b) (mean  $\pm$  SD) in MHRW containing *E. coli* in a standard 96 hr toxicity test.

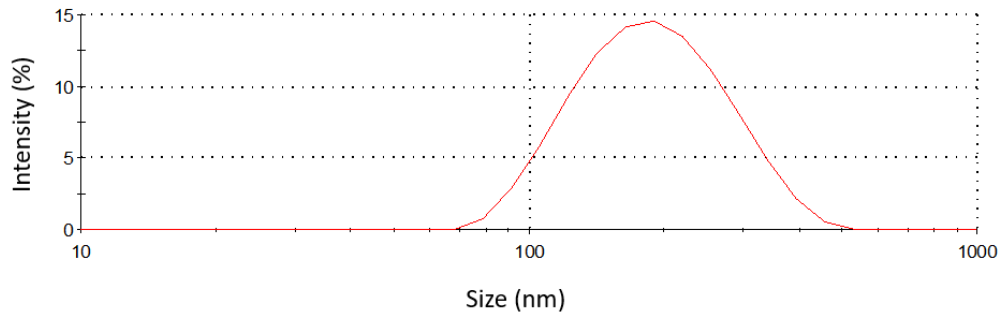

**Figure S6:** Size distribution of the CeO<sub>2</sub> NPs in the stock suspension (MHRW-T), as measured by dynamic light scattering (5 measurements, 10 runs each).

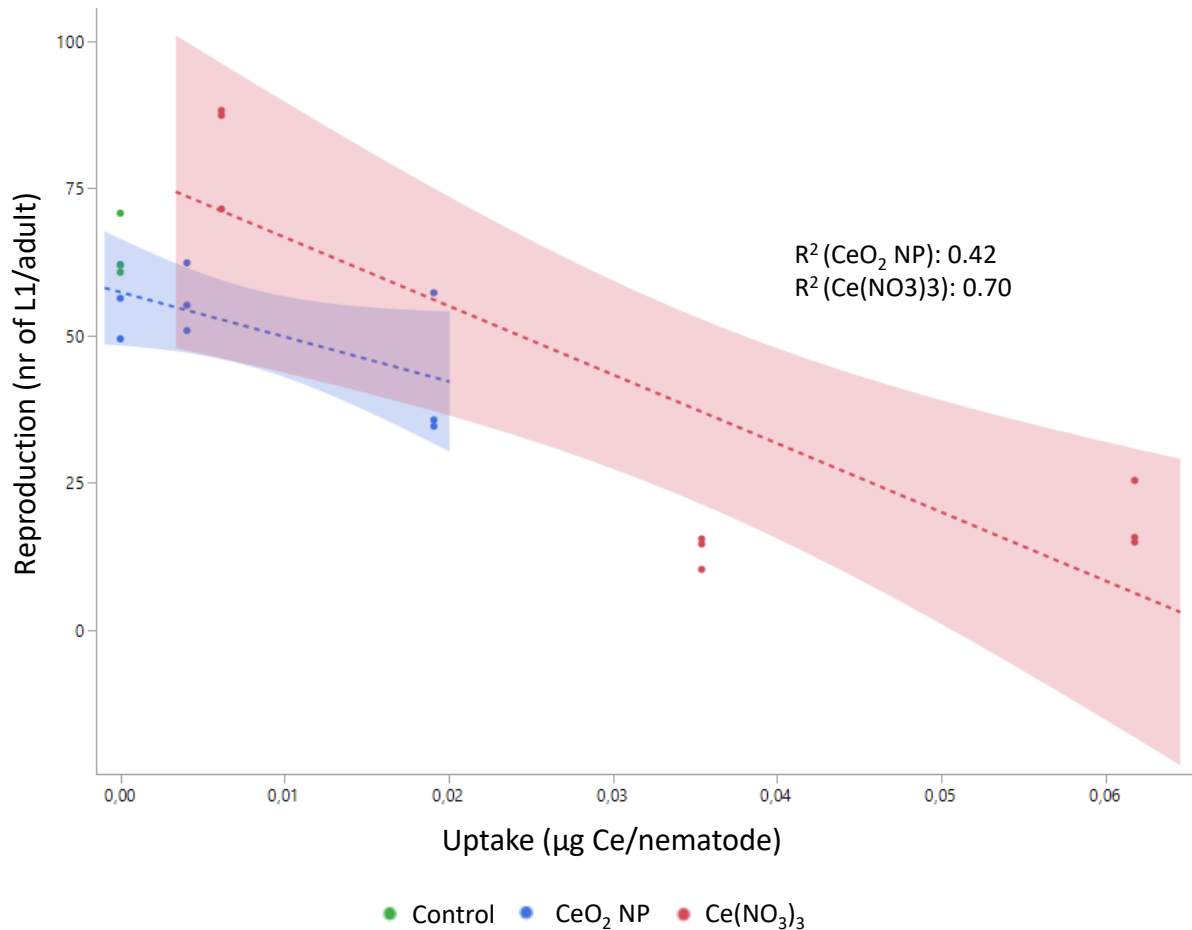

**Figure S7:** Measured reproduction (nr of L1s/hermaphrodites) as a function of Ce uptake (retained Ce/nematode follow depuration) with lines of best fit.

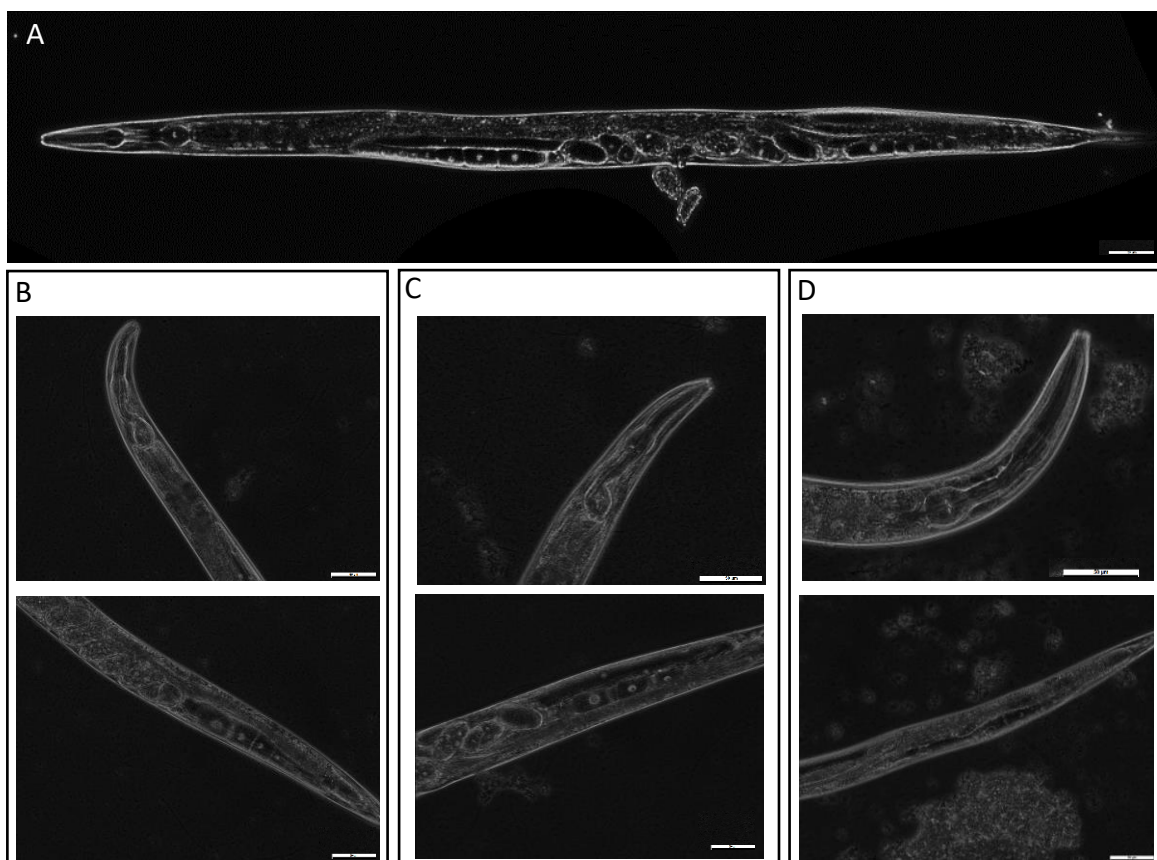

**Figure S8:** (A) Histological analysis of whole body control, or pharynx and posterior gonads, eggs, and intestine of (B) 17.48 mg/l or (C) 8.03 mg/l CeO<sub>2</sub> NP, or (D) 6.14 mg/l Ce(NO<sub>3</sub>)<sub>3</sub> exposed *C. elegans*. All scale bars represent 50 μm.

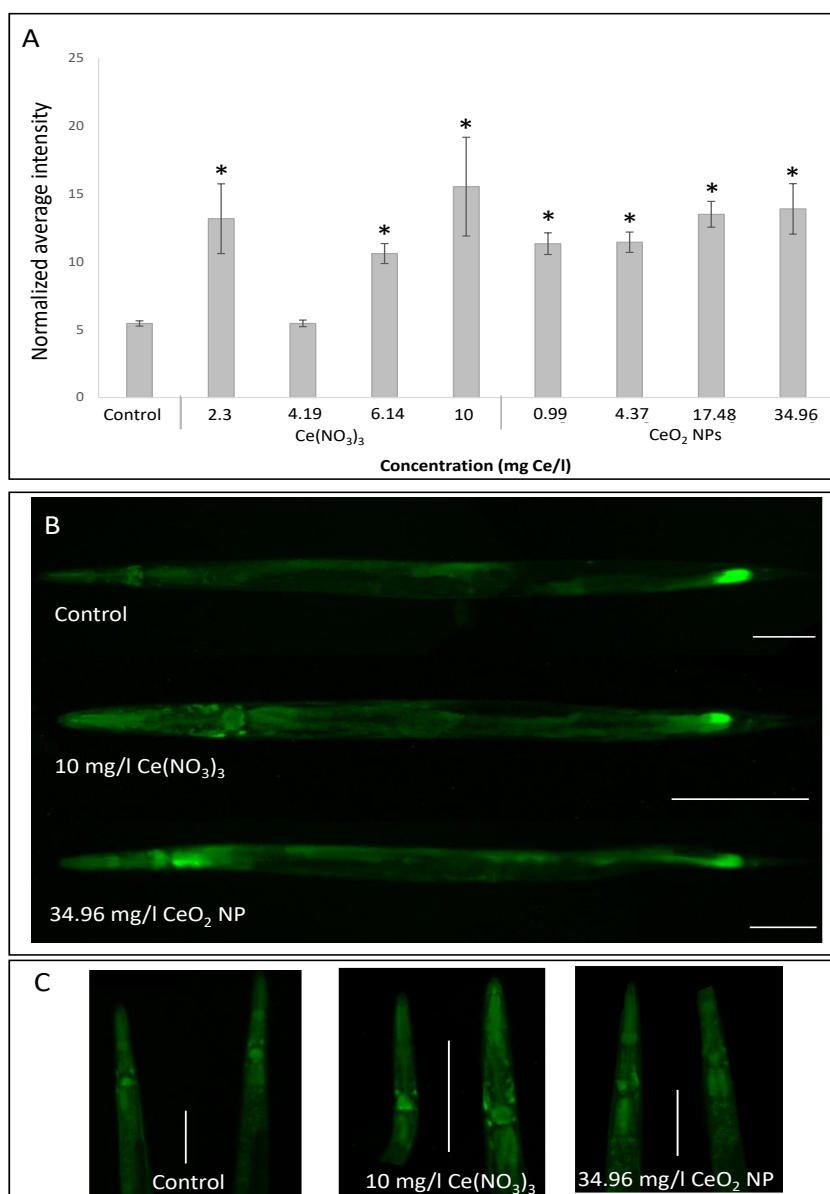

**Figure S9:** (A) Normalized average intensity measurements from the Sod-1 nematode strain after exposure to either Ce(NO<sub>3</sub>)<sub>3</sub> or CeO<sub>2</sub> NPs, and (B) representative Sod-1 nematode images, with (C) close up images of the pharynx for two individuals from 3 different treatments. Scale bars represent 100  $\mu$ m. Asterisk (\*) indicate a significant difference ( $p < 0.05$  students t-test) between the exposure group and control.

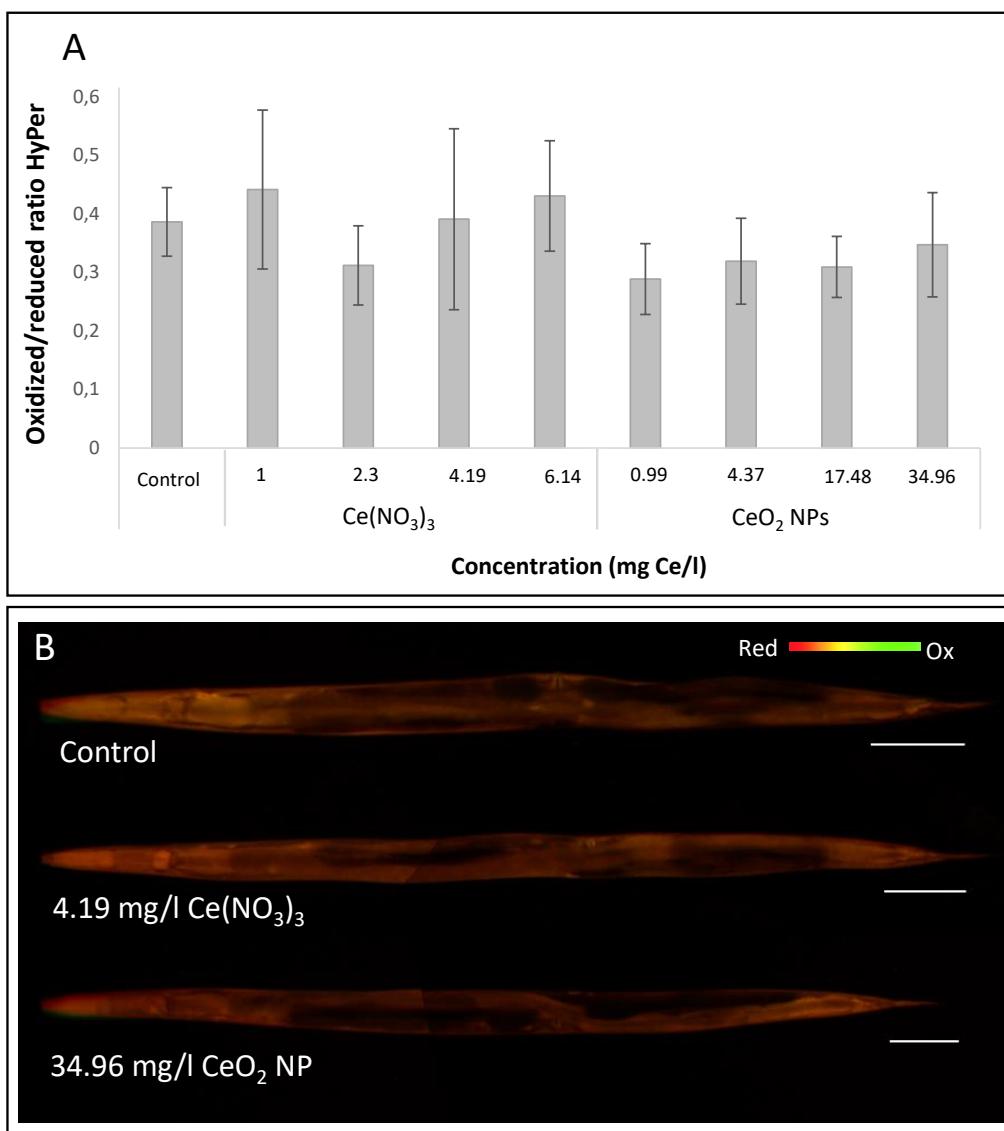

**Figure S10.** (A) Oxidized to reduced ratios of the hydrogen peroxide biosensor HyPer measured *in vivo* in response to the exposure to either Ce(NO<sub>3</sub>)<sub>3</sub> or CeO<sub>2</sub> NPs (n = 10 per concentration), with (B) corresponding representative images (n = 10 per concentration). Scale bars represent 100 μm.

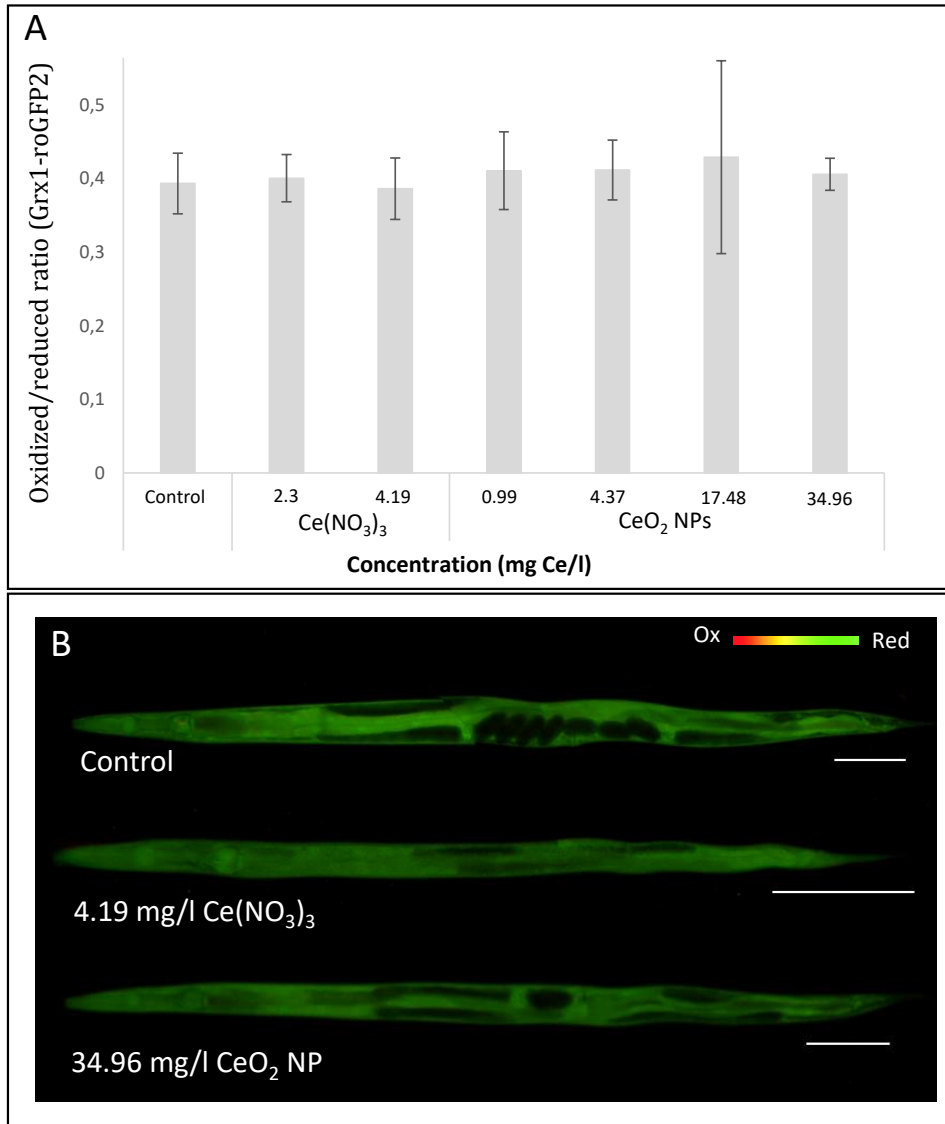

**Figure S11:** Oxidized to reduced ratios of the biosensor Grx1-roGFP2 (A) with corresponding representative images (B), measured *in vivo*, in response to the exposure to either  $\text{Ce}(\text{NO}_3)_3$  or  $\text{CeO}_2$  NPs (n = 10 per concentration). Scale bars represent 100  $\mu\text{m}$ .



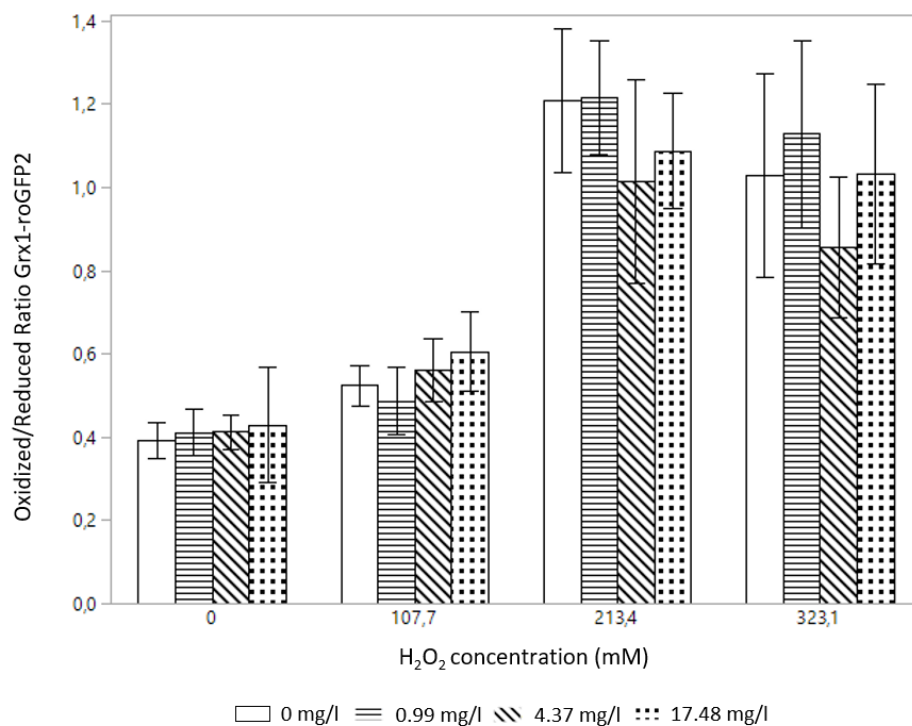

**Figure S12:** Oxidized to reduced ratios of the biosensor Grx1-roGFP2 measured *in vivo*, in response to a chronic 72 hour CeO<sub>2</sub> NP (0, 0.99, 4.37, or 17.48 mg Ce/l) exposure with a subsequent acute (6 min) exposure to H<sub>2</sub>O<sub>2</sub> (0, 107.7, 213.4, or 323.1 mM) (n = 10 nematodes per concentration).

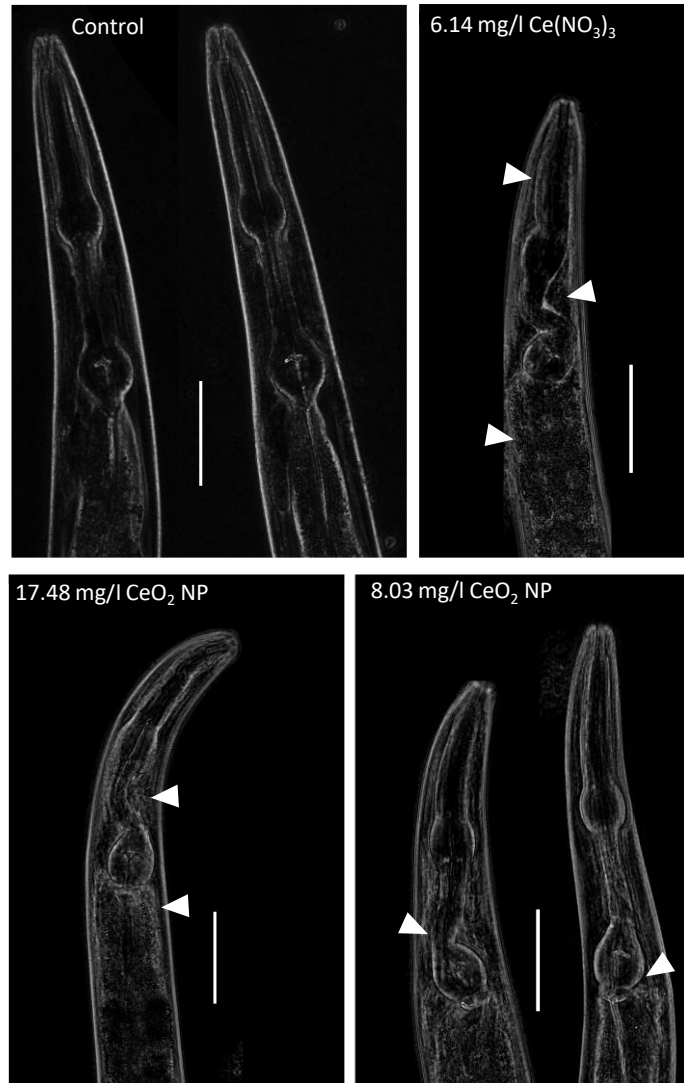

**Figure S13:** Pharyngeal deformities of N2 strain *C. elegans* exposed to either  $\text{Ce}(\text{NO}_3)_3$  or  $\text{CeO}_2$  NPs for 72 hours in MHRW. Arrows indicate deformities observed in nematodes exposed to either  $\text{Ce}(\text{NO}_3)_3$  or  $\text{CeO}_2$  NPs. Scale bars represent 100  $\mu\text{m}$ .

## References:

1. United States Environmental Protection Agency, U.E., *Methods for Measuring the Acute Toxicity of Effluents and Receiving Waters to Freshwater and Marine Organisms, 5th edition. EPA-821-R-02-012. Office of water, Washington DC, USA. 2002.*
2. ISO, *Water quality -- Determination of the toxic effect of sediment and soil samples on growth, fertility and reproduction of Caenorhabditis elegans (Nematoda). ISO 10872:2010. Geneva, Switzerland., 2010.*
3. Rossbach, L.M., Oughton, D. H., Maremonti, E., Coutris, C., and Brede, D. A. *In vivo assessment of silver nanoparticle induced reactive oxygen species reveals tissue specific effects on cellular redox status in the nematode Caenorhabditis elegans. Sci. Total Environ., 2020. 721: p. 137665.*
4. Maremonti, E., Eide, D. M., Rossbach, L. M., Lind, O. C., Salbu, B., and Brede, D. A. *In vivo assessment of reactive oxygen species production and oxidative stress effects induced by chronic exposure to gamma radiation in Caenorhabditis elegans. Radic Bio., 2019.*
5. Back, P., De Vos, W. H., Depuydt, G. G., Matthijssens, F., VanFleteren, J. R., and Braeckman, B. P. *Exploring Real-Time in vivo Redox Biology of Developing and Aging Caenorhabditis elegans. Radic. Bio., 2012. 52(5): p. 850-859.*
6. Doonan, R., McElewee, J. J., Matthijssens, F., Walker, G. A., Houthoofd, K., Back, P., Matscheski, A., VanFleteren, J. R., and Gems, D. *Against the Oxidative Damage Theory of Aging: Superoxide Dismutases Protect Against Oxidative Stress but have Little or no Effect on Life Span in Caenorhabditis elegans. Genes Dev., 2008. 22(23): p. 3236-3241.*
7. Kosmulski, M., *The pH dependent surface charging and points of zero charge. VII. Update. Adv. Colloid Interface Sci., 2018. 251: p. 115-138.*
8. Kleiven, M., Rossbach, L. M., Gallego-Urrea, J. A., Brede, D. A., Oughton, D. H., and Coutris, C. *Characterizing the behavior, uptake, and toxicity of NM300K silver nanoparticles in Caenorhabditis elegans. Environ. Toxicol. Chem., 2018. 37(7): p. 1799 - 1810.*
